# Supplementary material for: High-resolution stable isotope signature of a land-falling atmospheric river in southern Norway
Source: Copernicus journal article supplement (doi:10.5194/wcd-2-713-2021), 2021-08-05
Supplement: Supplementary file 1 [file wcd-2-713-2021-supplement.zip]

Archive with 2 entries (2 files):
- wcd-2-713-2021-supplement-title-page.pdf
- data_AR20161207_isotope_Weng2020.xlsx
