# Supplementary material for: High-resolution stable isotope signature of a land-falling atmospheric river in southern Norway
Source: Copernicus journal article supplement (doi:10.5194/wcd-2-713-2021), 2021-08-05
Supplement: Supplementary file 1 [file wcd-2-713-2021-supplement.zip › wcd-2-713-2021-supplement-title-page.pdf]

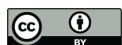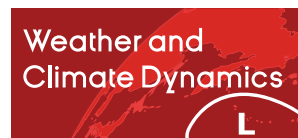

Open Access

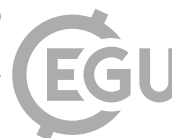

*Supplement of*

## **High-resolution stable isotope signature of a land-falling atmospheric river in southern Norway**

**Yongbiao Weng et al.**

*Correspondence to:* Harald Sodemann ([harald.sodemann@uib.no](mailto:harald.sodemann@uib.no))

- [wcd-2-713-2021-supplement-title-page.pdf](#)
- [data\\_AR20161207\\_isotope\\_Weng2020.xlsx](#)

The copyright of individual parts of the supplement might differ from the article licence.
